# Supplementary material for: Studies towards the synthesis of the functionalized C3–C14 decalin framework of alchivemycin A
Source: Royal Society of Chemistry journal article supplement (doi:10.1039/c5qo00343a), 2015-12-21

## **Studies towards the synthesis of the functionalized C3-C14 decalin framework of alchivemycin A**

Kaiqing Ma,<sup>†ab</sup> Daohong Liao,<sup>†bc</sup> Shaoqiang Yang,<sup>b</sup> Xiaofei Li,<sup>c</sup> and Xiaoguang Lei<sup>\*bc</sup>

a. Modern Research Center for Traditional Chinese Medicine of Shanxi University, No. 92, Wucheng Road, Taiyuan 030006, Shanxi, China.

b. Beijing National Laboratory for Molecular Sciences, Key Laboratory of Bioorganic Chemistry and Molecular Engineering of Ministry of Education, Department of Chemical Biology, College of Chemistry and Molecular Engineering, Synthetic and Functional Biomolecules Center, and Peking-Tsinghua Center for Life Sciences, Peking University, Beijing 100871, China.

c. National Institute of Biological Sciences (NIBS), Beijing 102206, China

† These authors contributed equally

# Supporting Information

## $^1\text{H}$ and $^{13}\text{C}$ NMR spectra

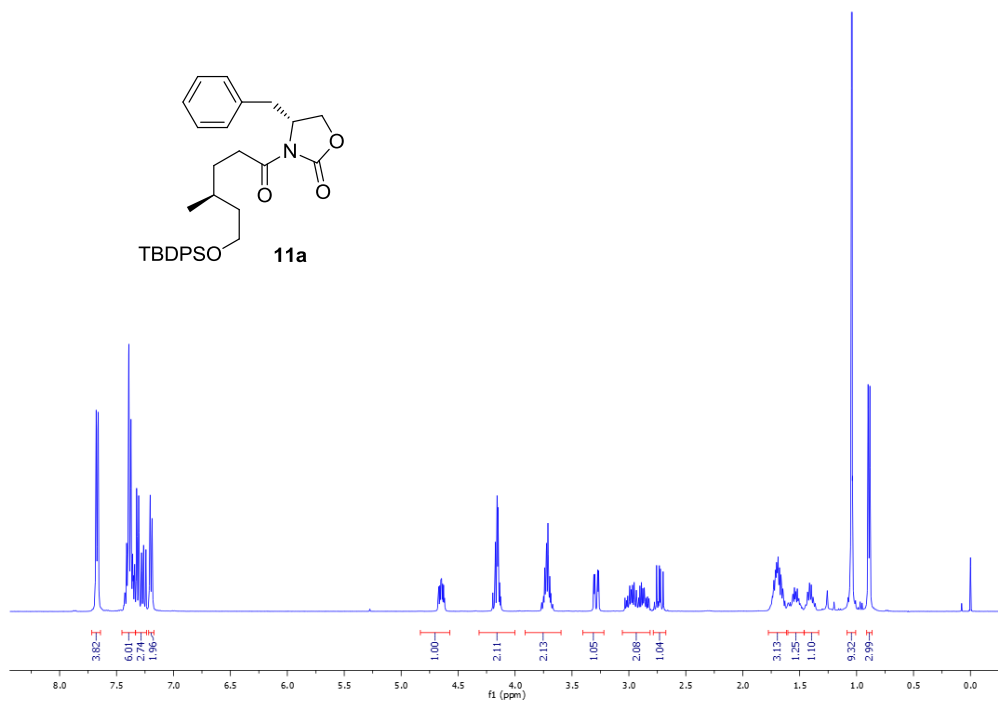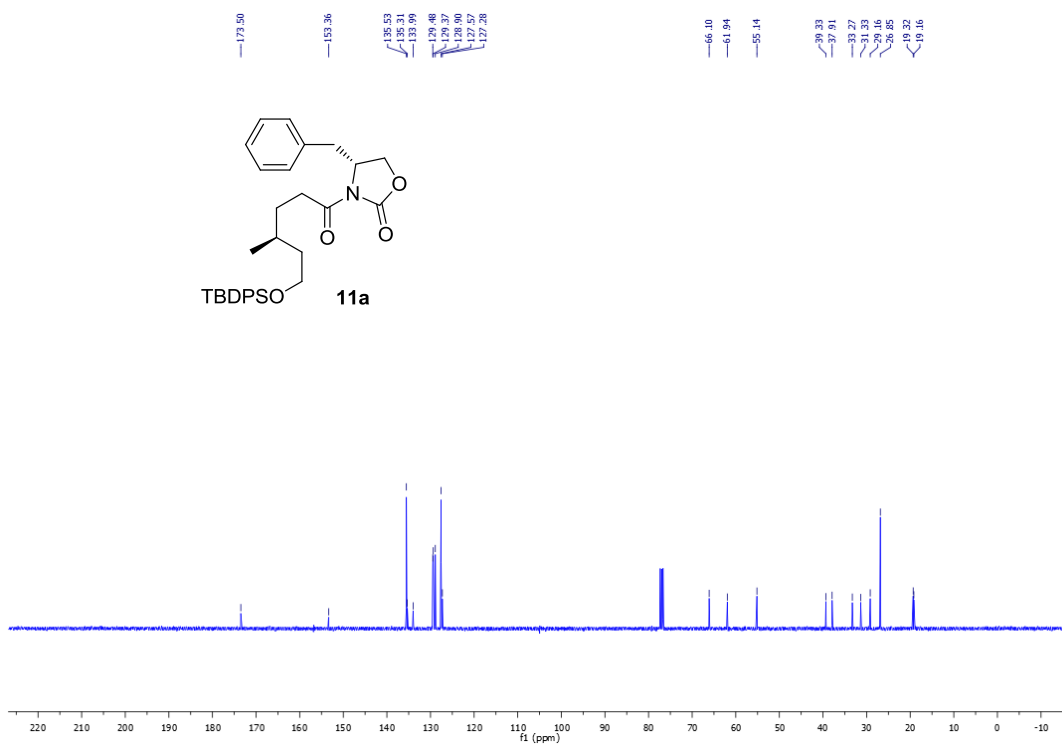

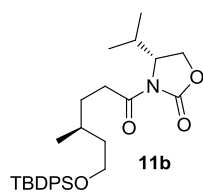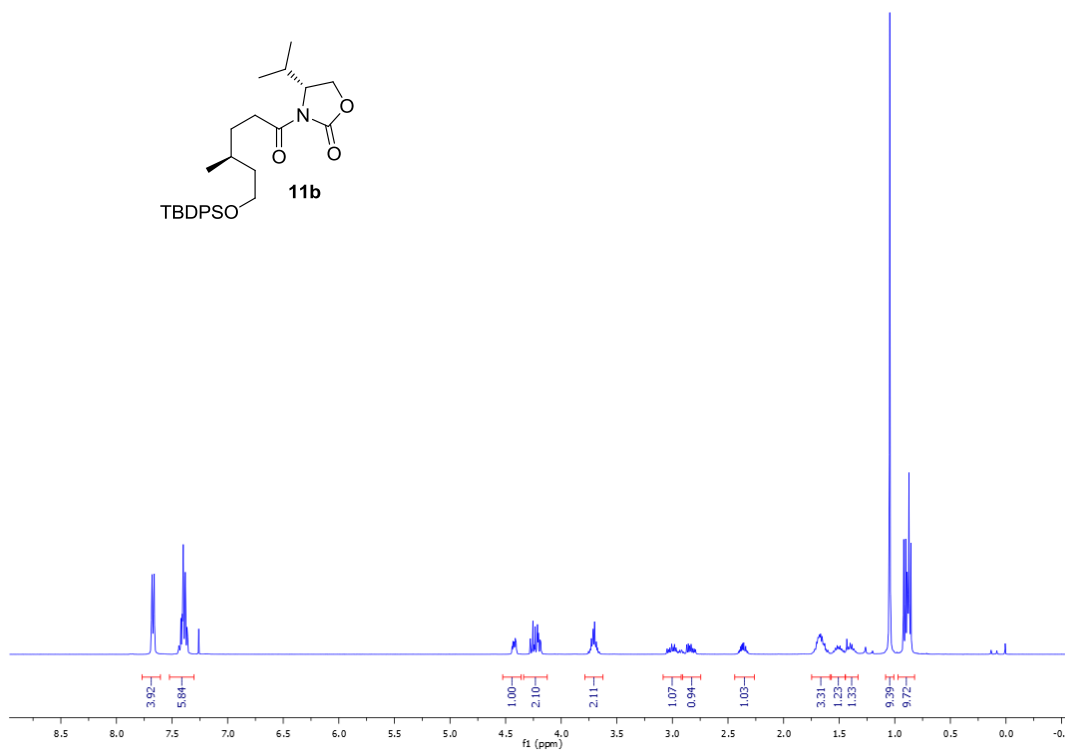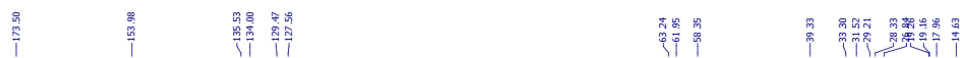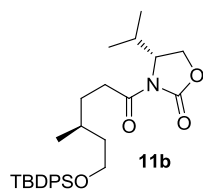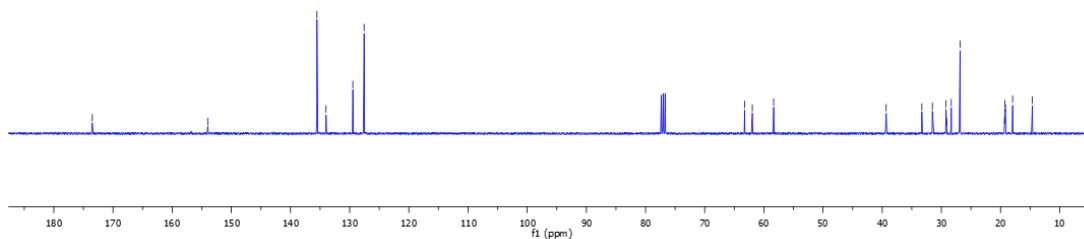

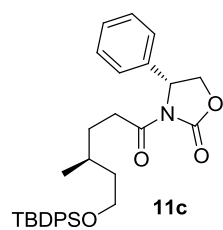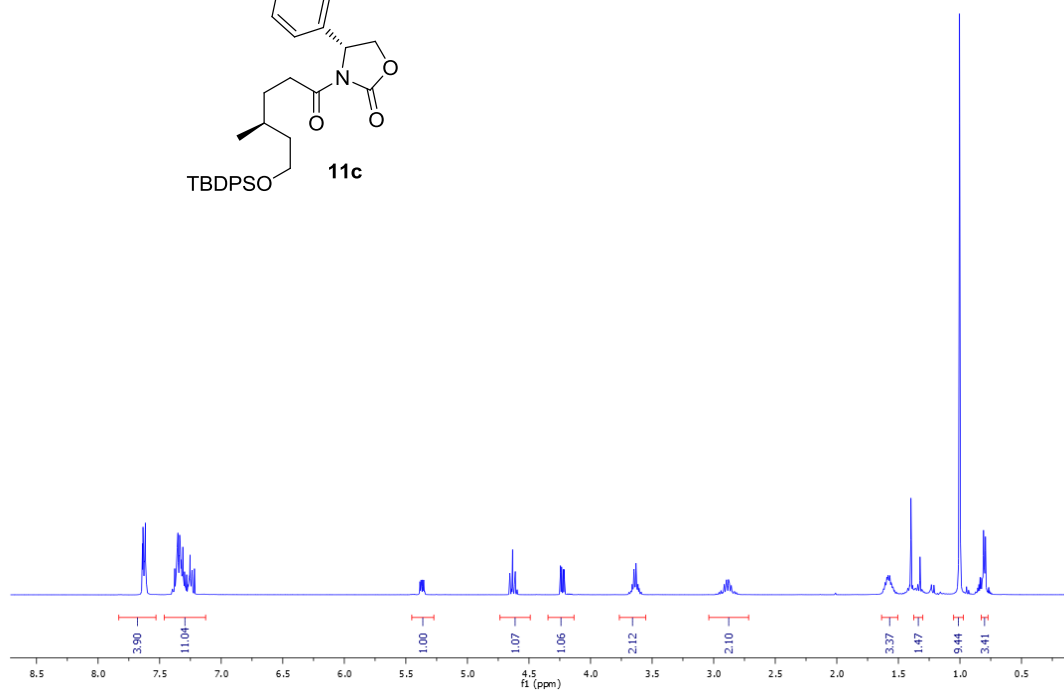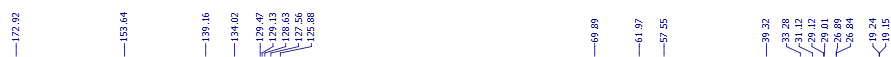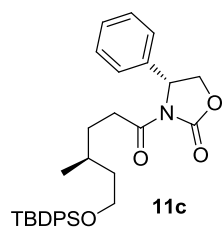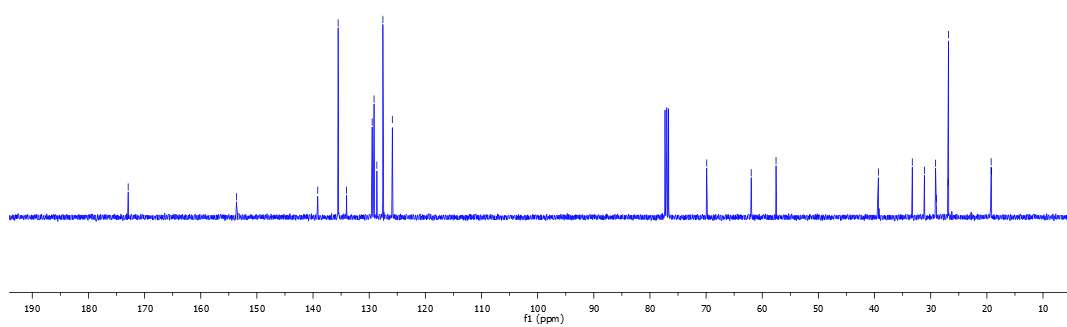

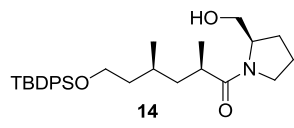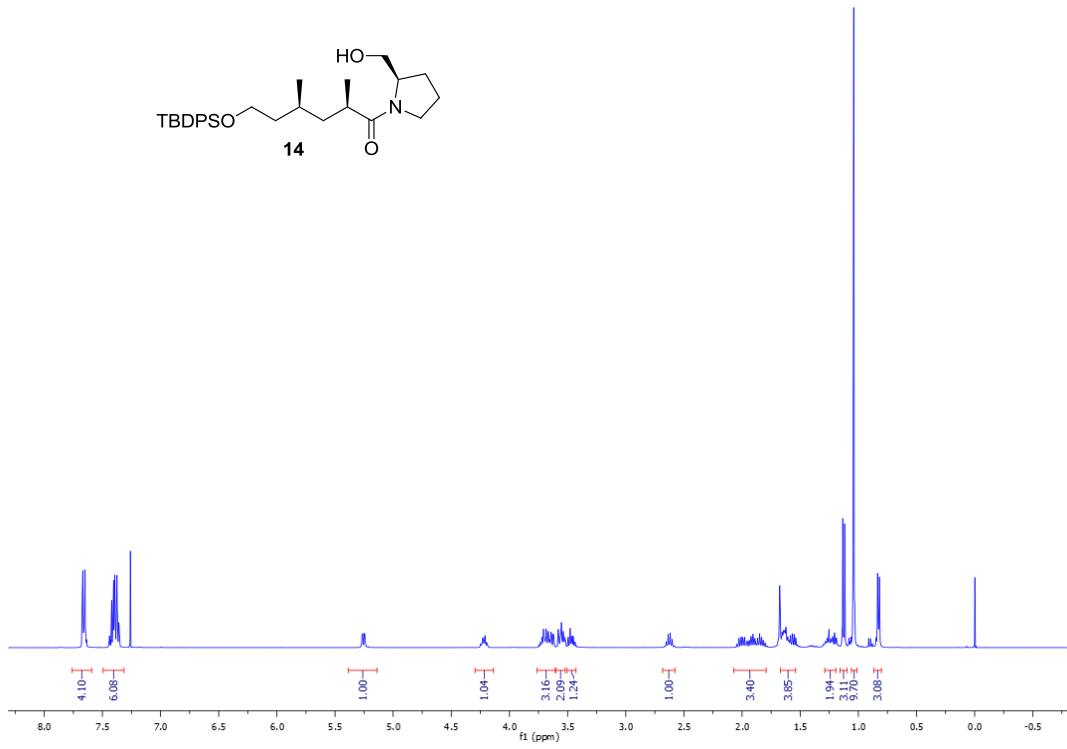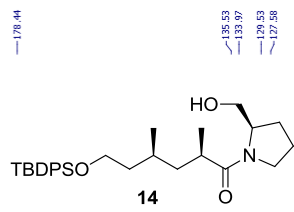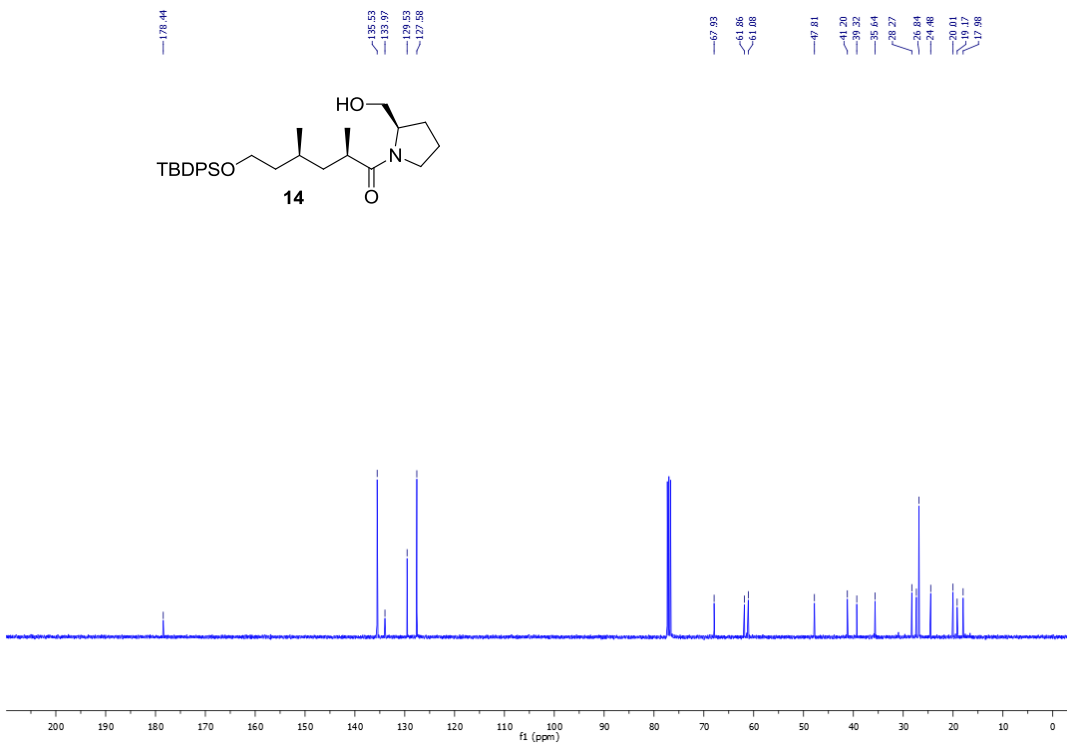



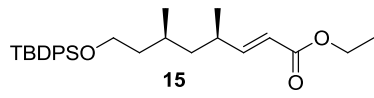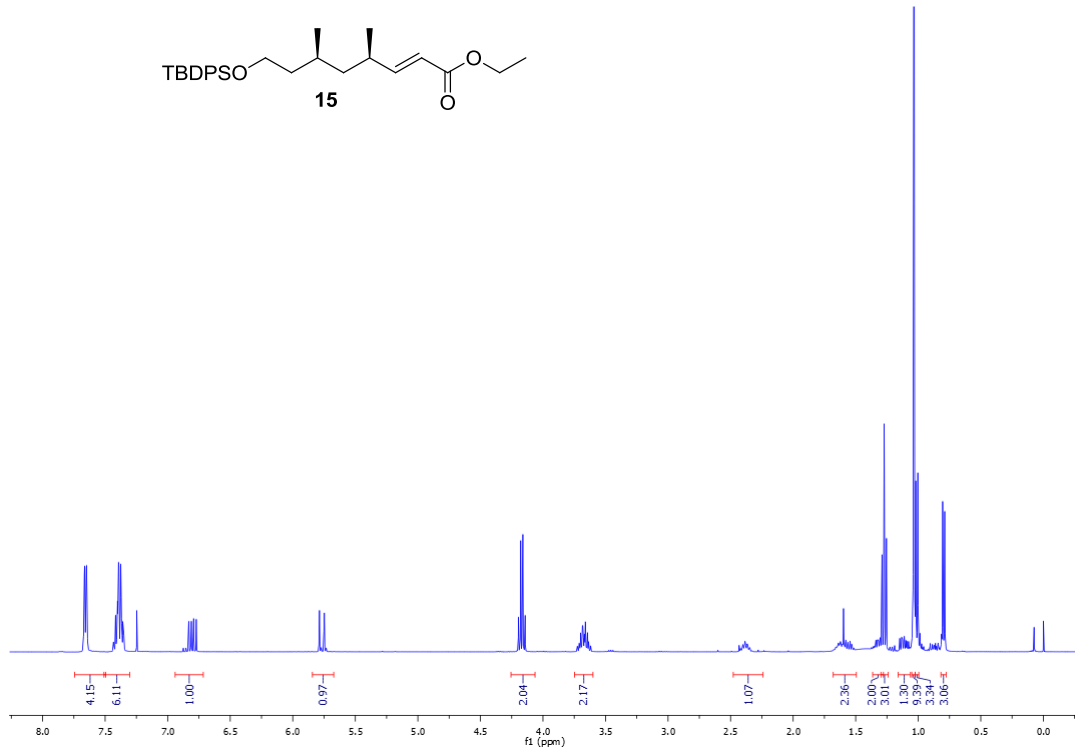

166.28  
 154.41  
 135.56  
 134.64  
 134.00  
 133.98  
 129.50  
 127.57  
 119.70  
 61.26  
 60.10  
 43.25  
 39.83  
 34.09  
 27.60  
 26.80  
 26.83  
 20.17  
 19.34  
 19.13  
 14.26

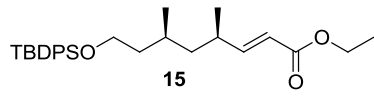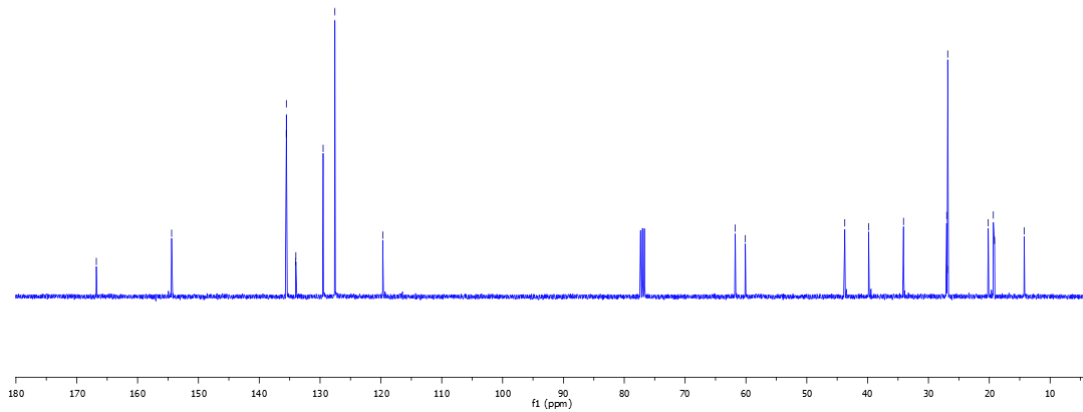

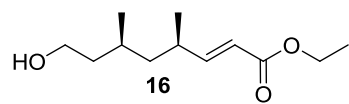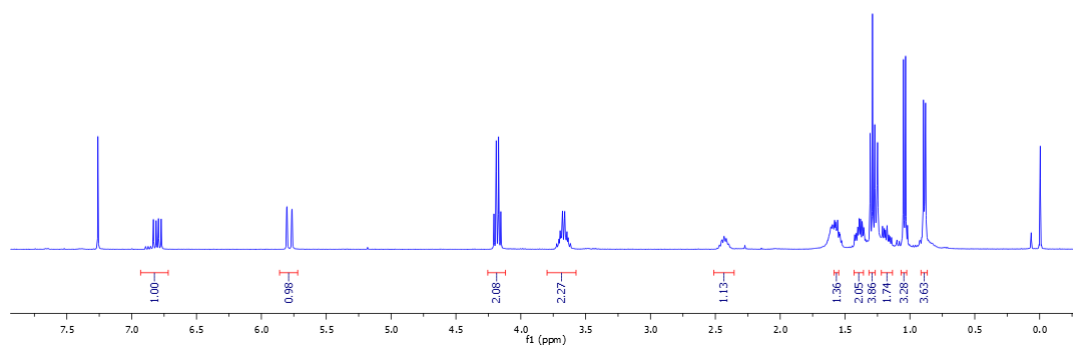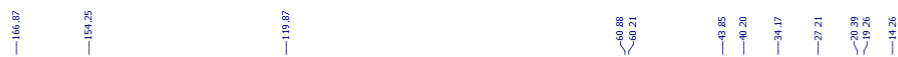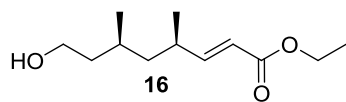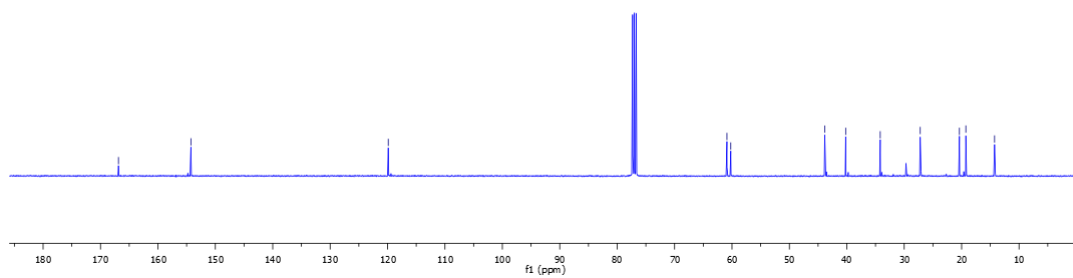



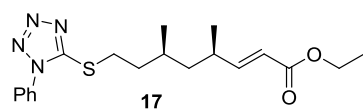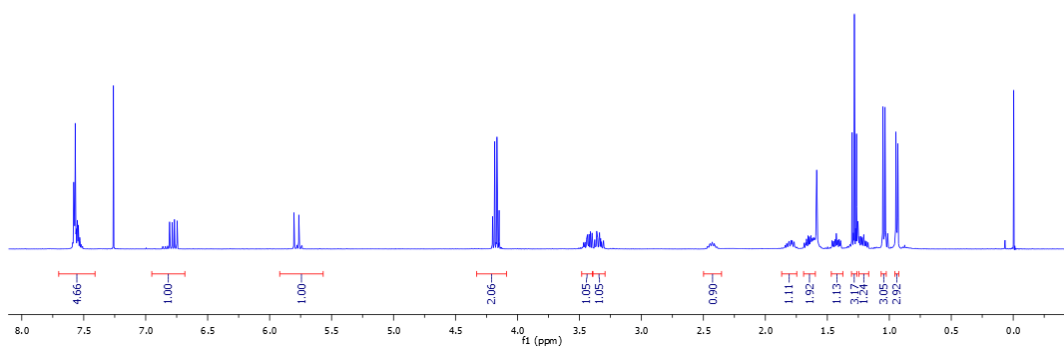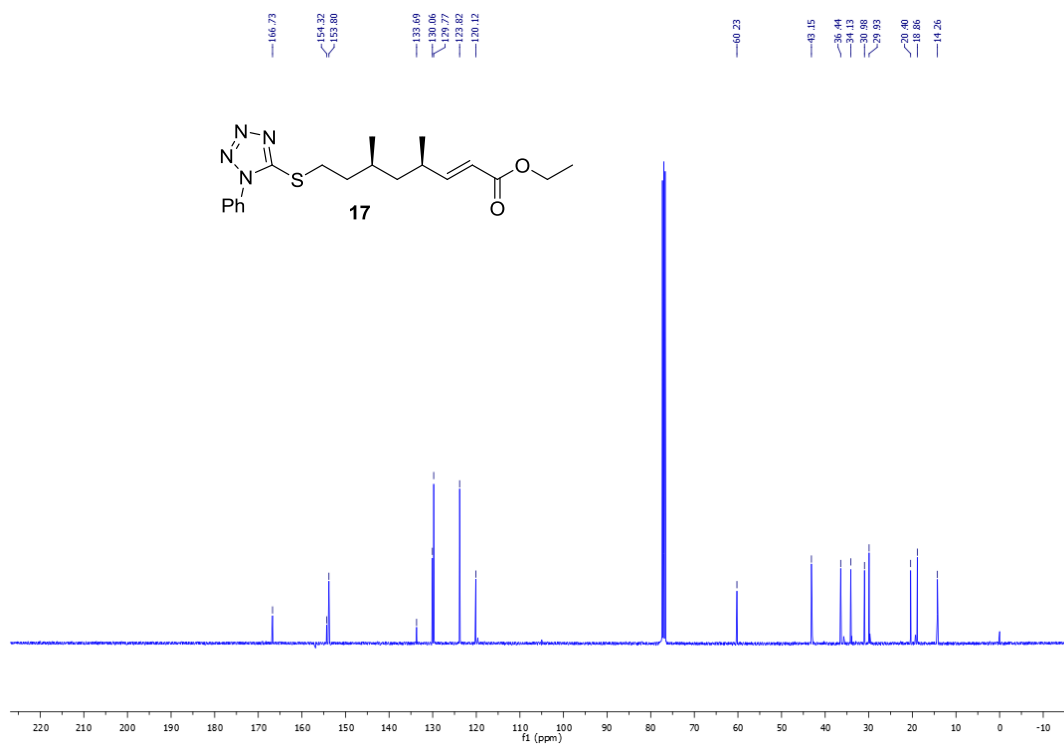

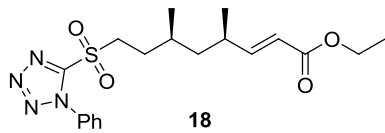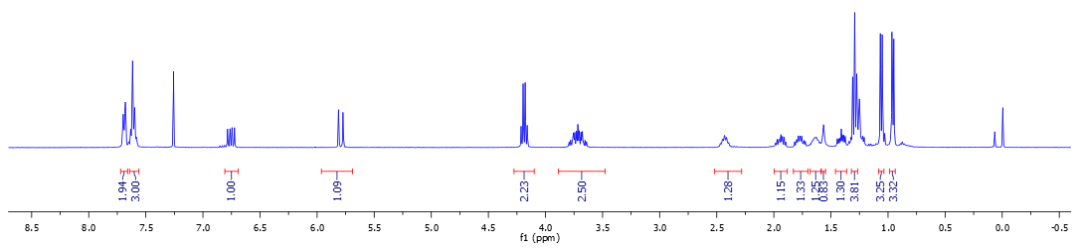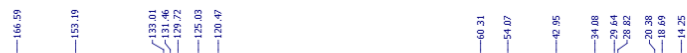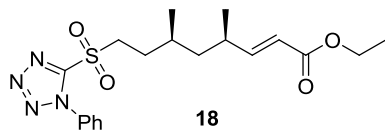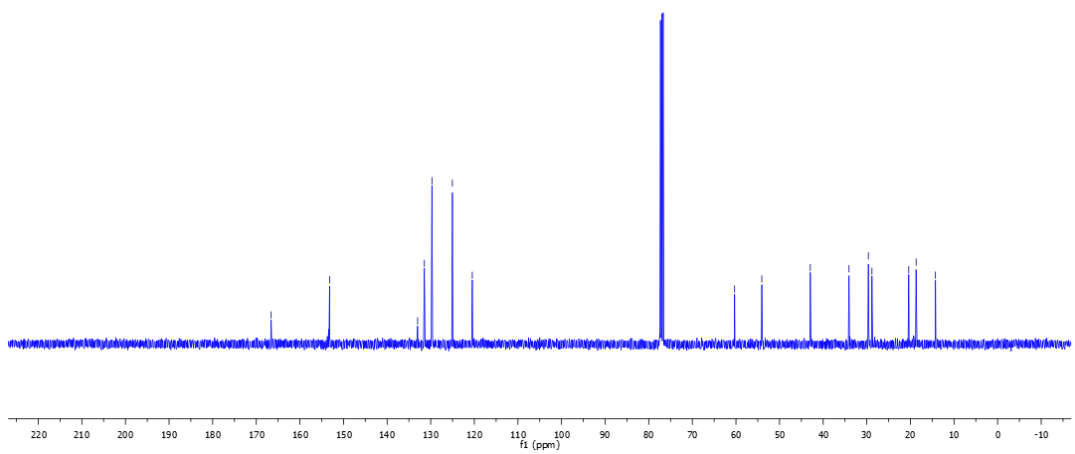



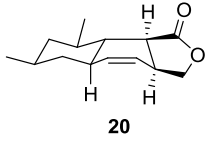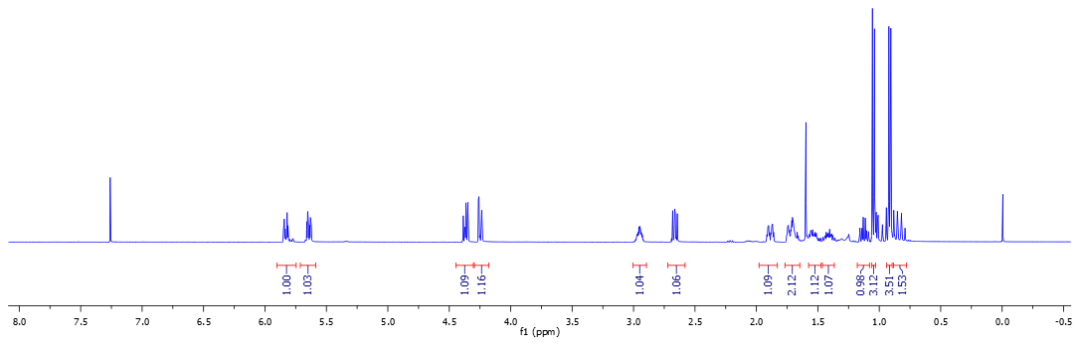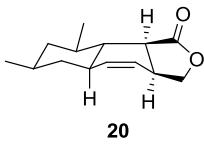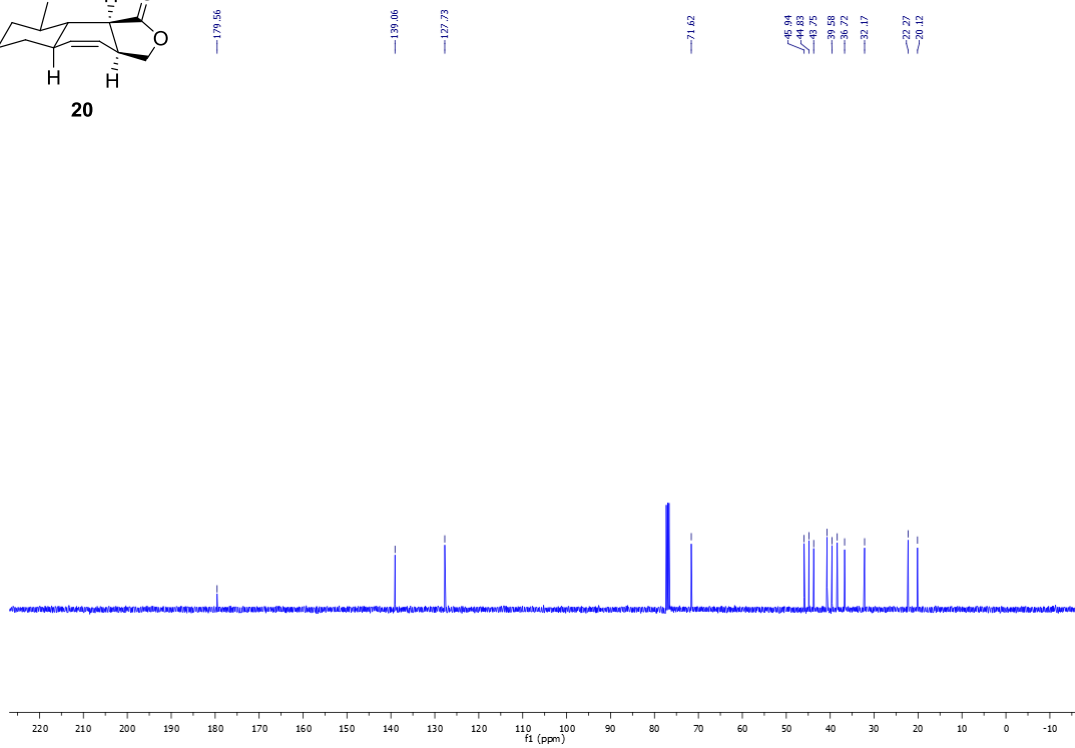

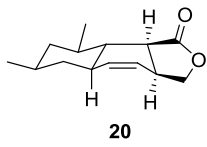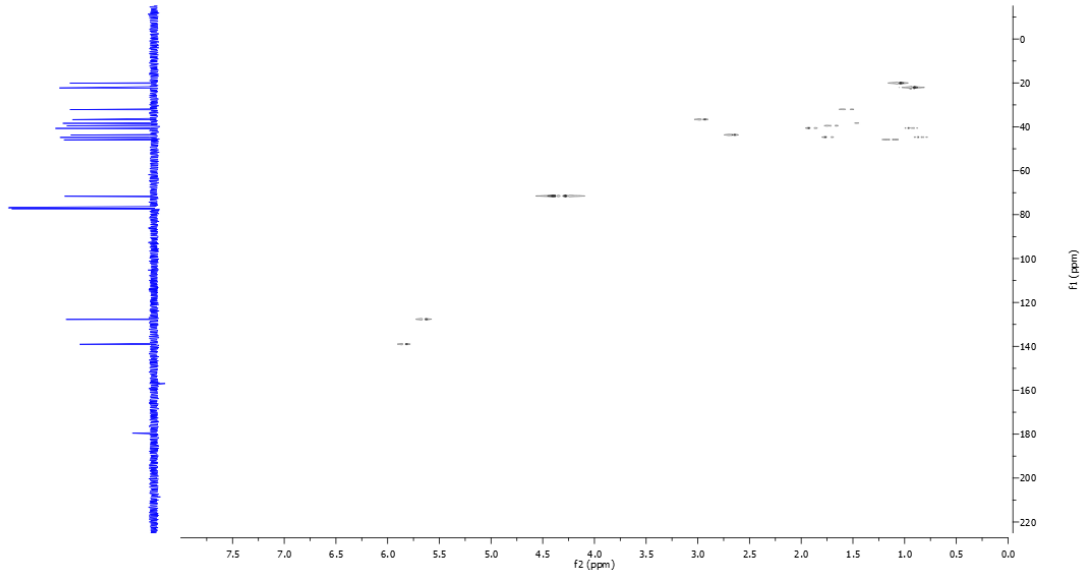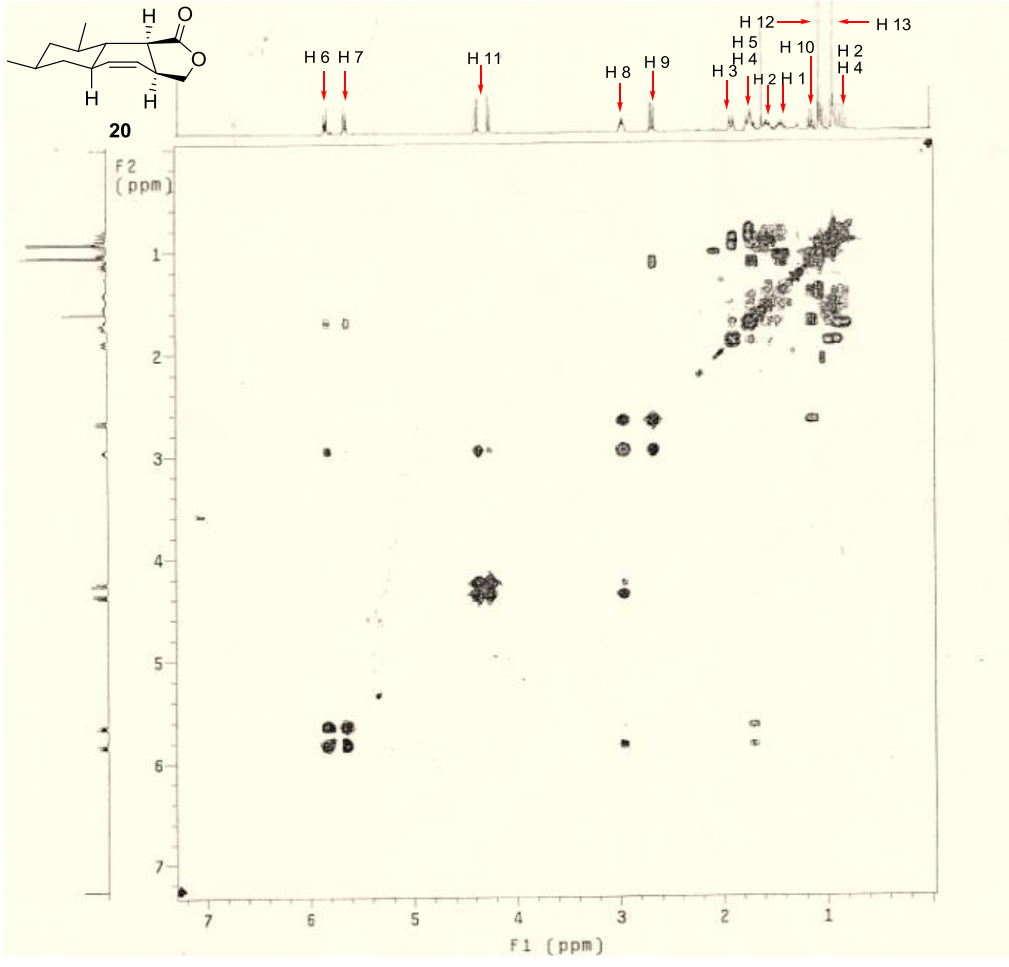

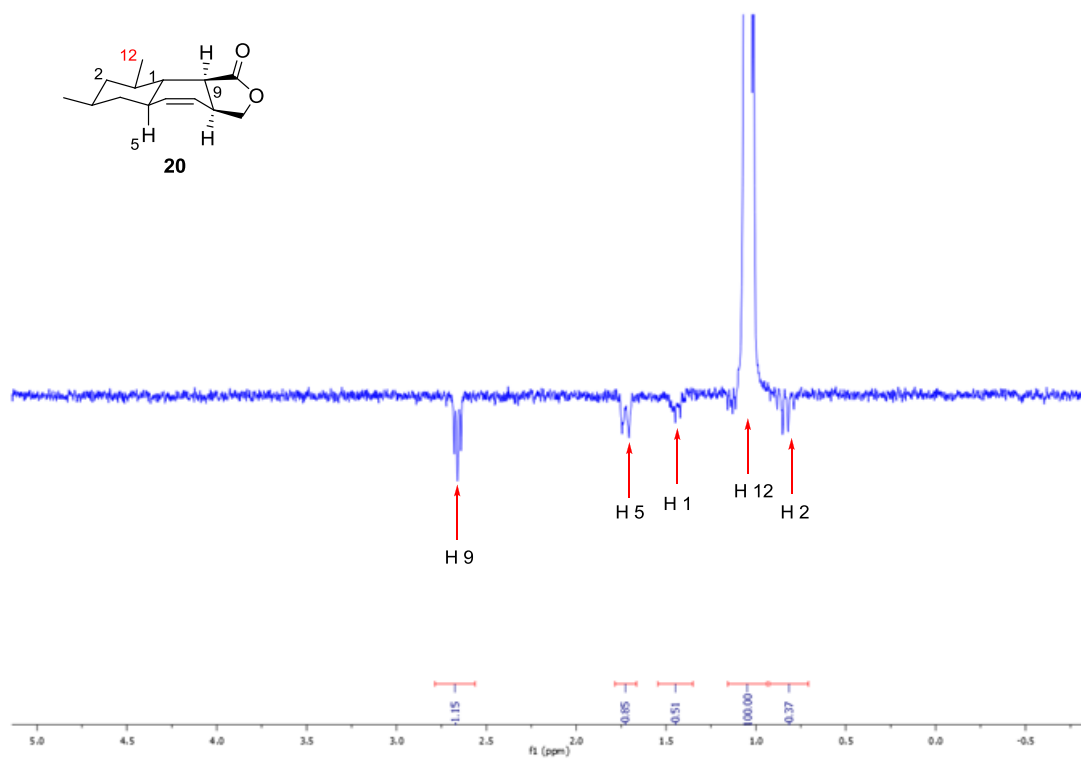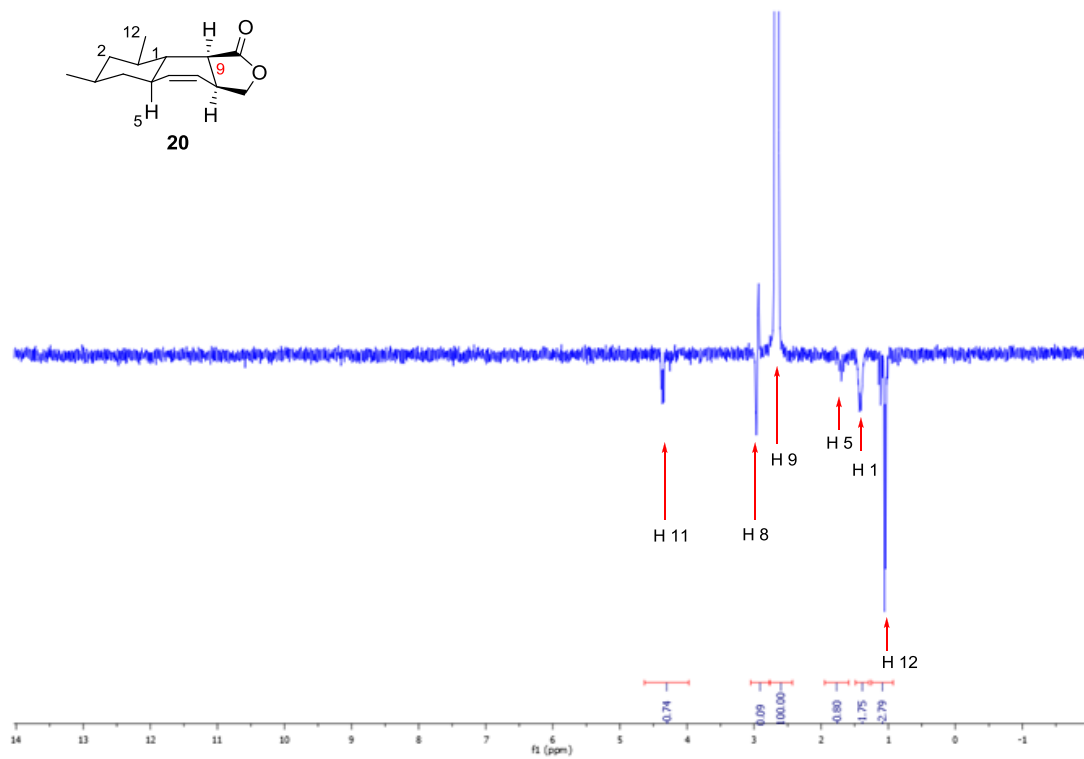

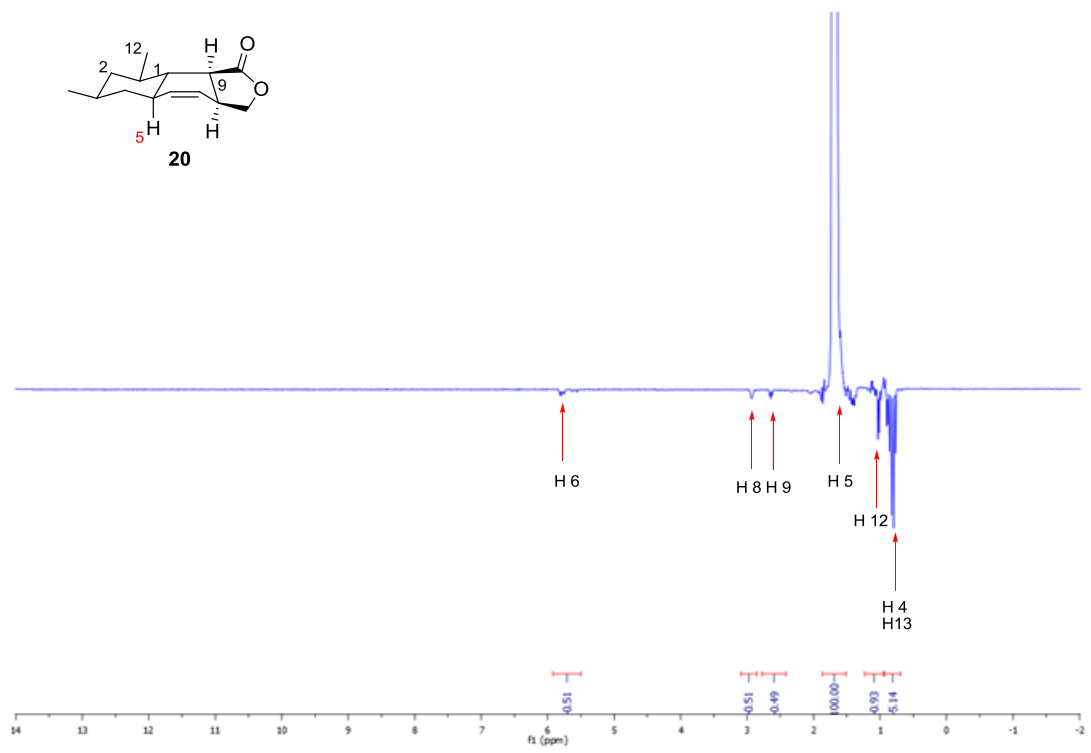

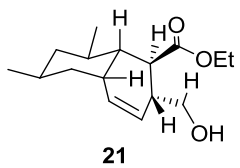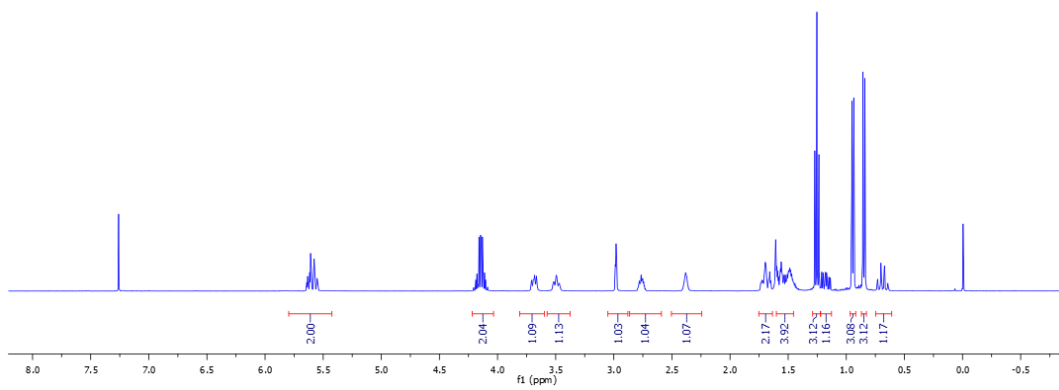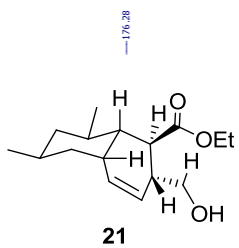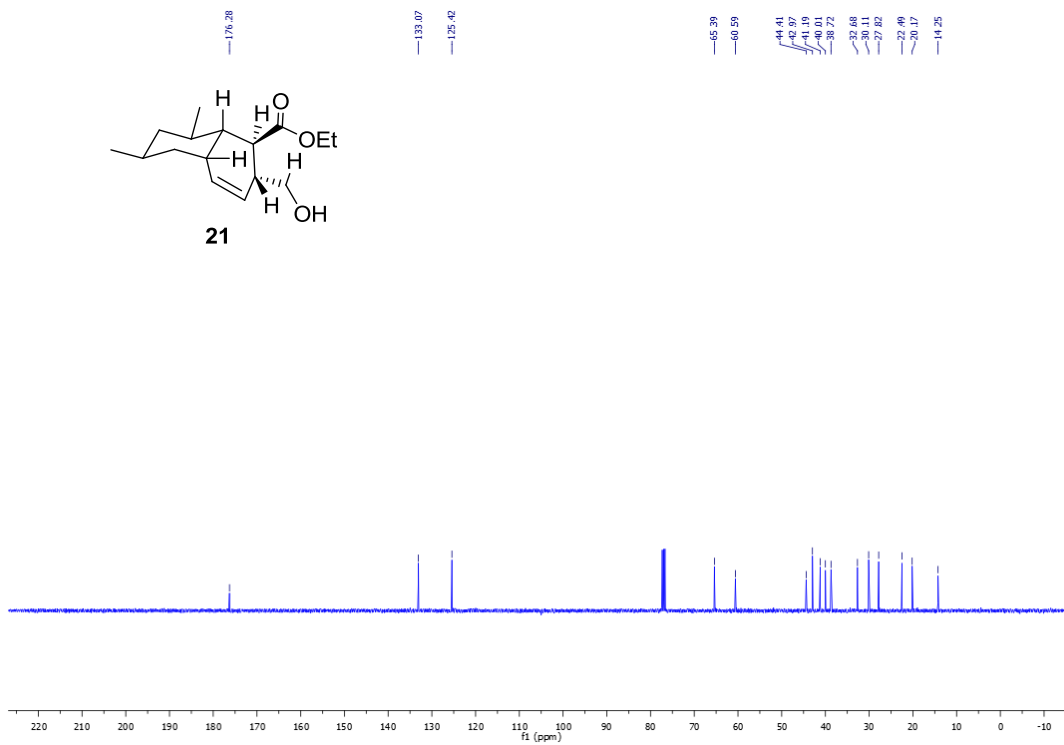



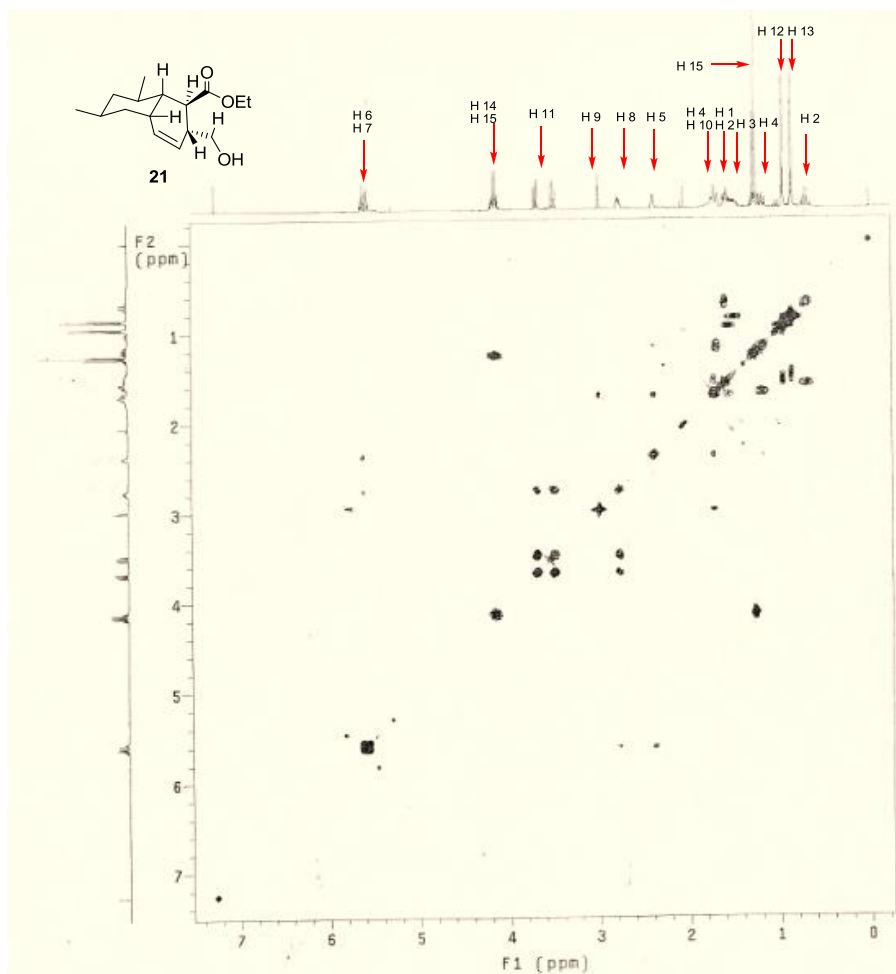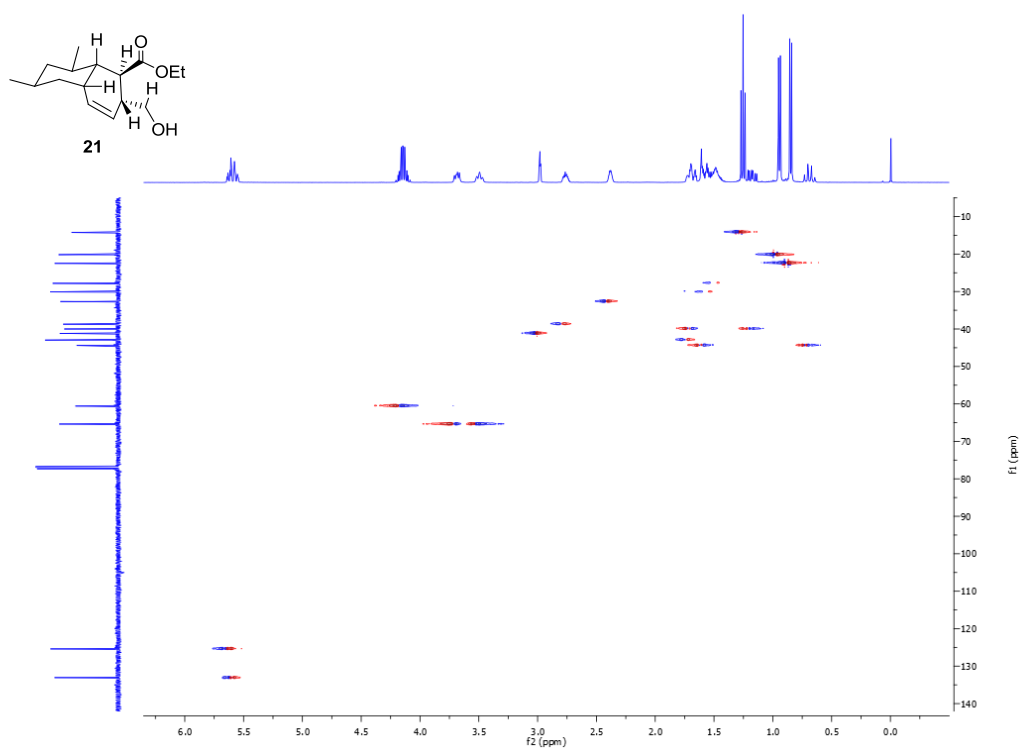

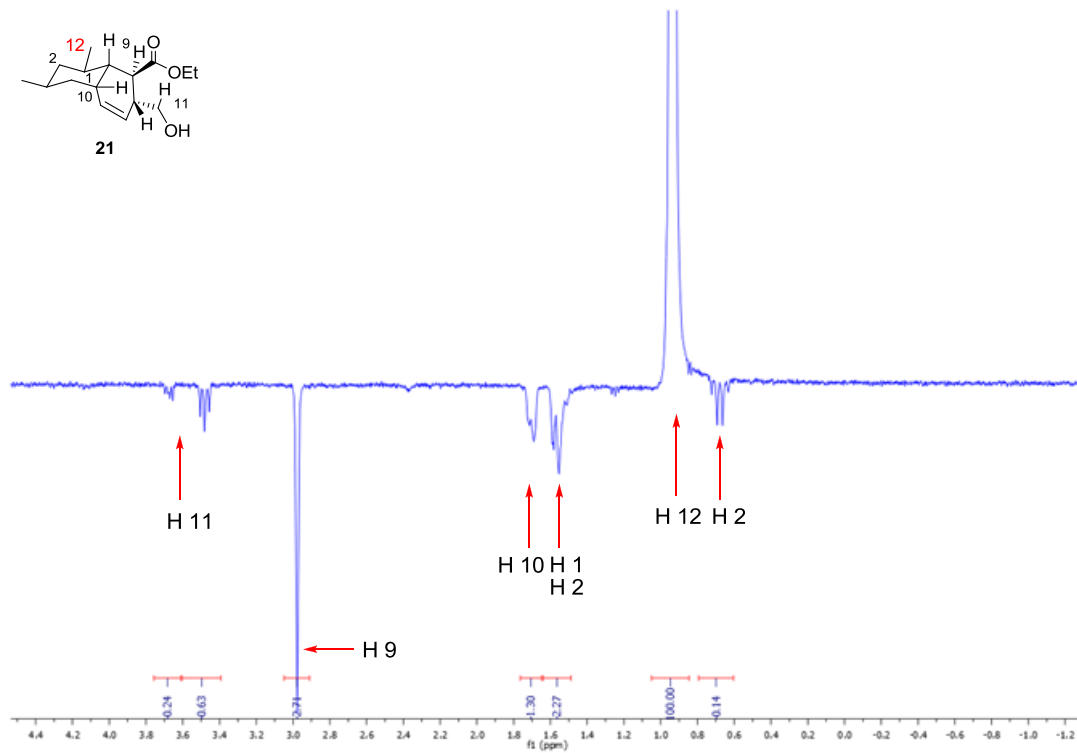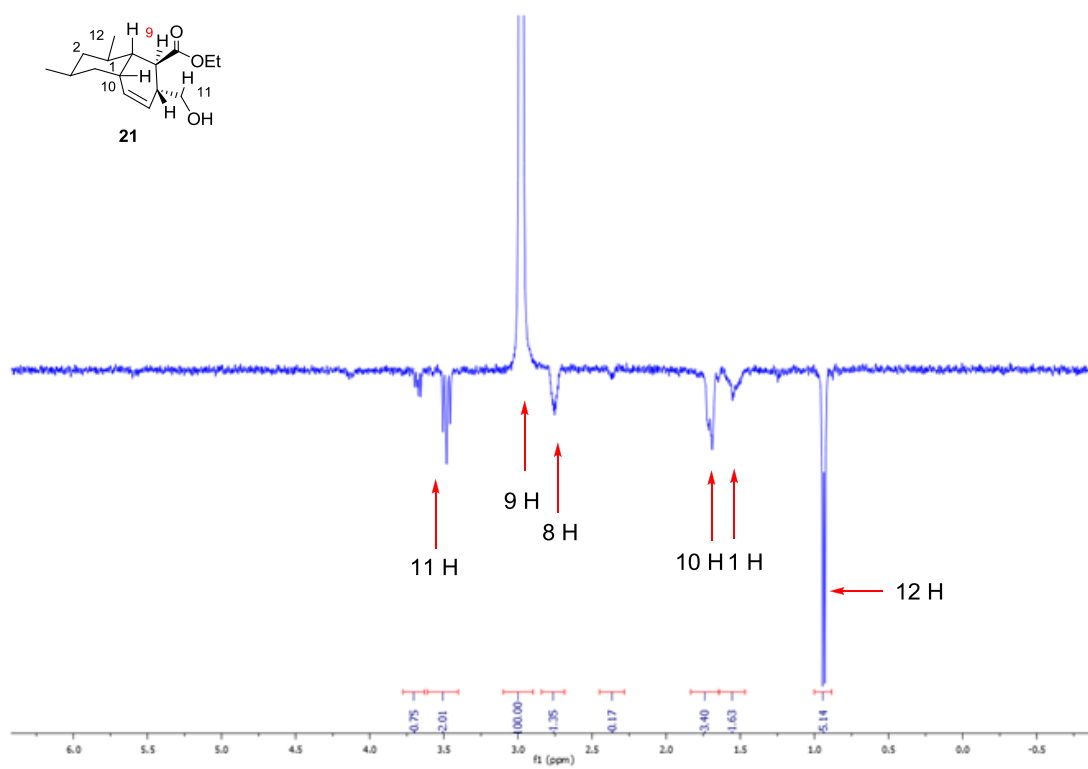

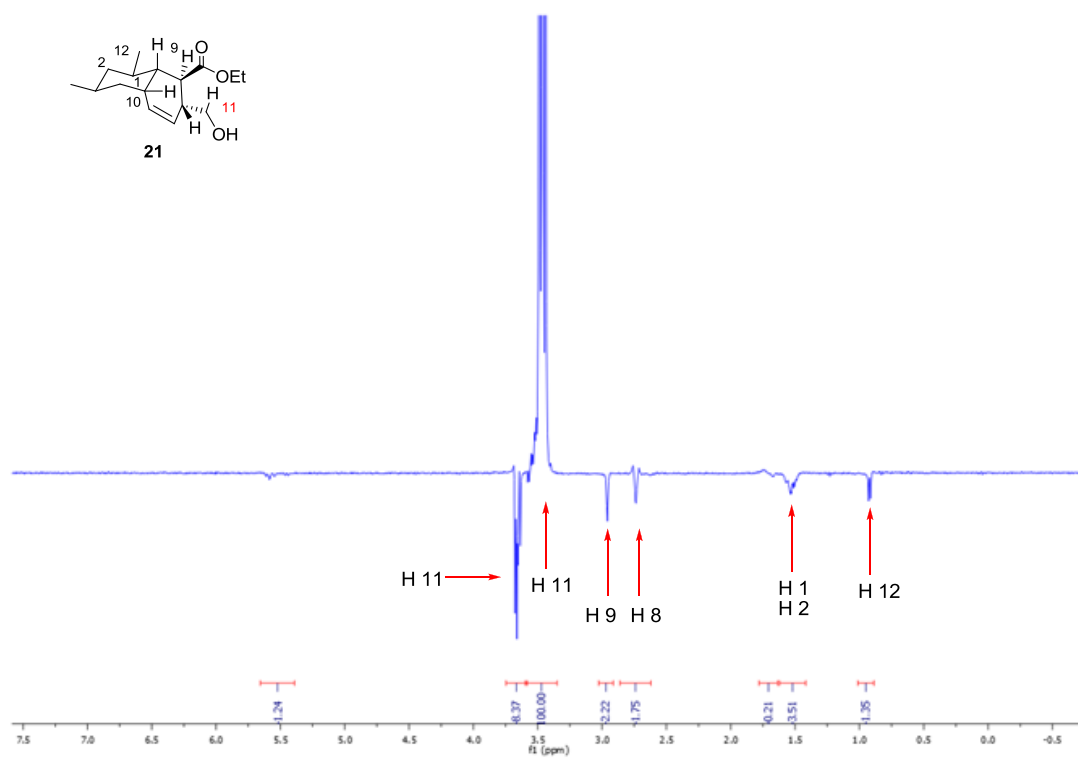

Supplement: c5qo00343a1.pdf [file c5qo00343a1.pdf]
